# Supplementary material for: Neck Injury Comorbidity in Concussion-Related Emergency Department Visits: A Population-Based Study of Sex Differences Across the Life Span
Source: PubMed Central journal article supplement (PMC6482894; doi:10.1089/jwh.2018.7282), 2019-04-22
Supplement: Supp_Table1.pdf [file Supp_Table1.pdf]

Supplementary Table S1. Number of First Concussion-Related Emergency Department Visits and Rate of Comorbid Neck Injuries per 100,000 Concussion-Related Emergency Department Visits in Ontario, Canada, 2002/2003–2011/2012, by Age Groups and Sex

| Characteristic               | All concussions                |                              |                              |                              |                              |                              | MYC-related concussions        |                              |                              |                              |                              |                              | Sports-related concussions     |                              |                              |       |  |  |
|------------------------------|--------------------------------|------------------------------|------------------------------|------------------------------|------------------------------|------------------------------|--------------------------------|------------------------------|------------------------------|------------------------------|------------------------------|------------------------------|--------------------------------|------------------------------|------------------------------|-------|--|--|
|                              | Rate of comorbid neck injuries |                              |                              |                              |                              |                              | Rate of comorbid neck injuries |                              |                              |                              |                              |                              | Rate of comorbid neck injuries |                              |                              |       |  |  |
|                              | Overall                        | Males                        | Females                      | Overall                      | Males                        | Females                      | Overall                        | Males                        | Females                      | Overall                      | Males                        | Females                      | Overall                        | Males                        | Females                      |       |  |  |
| Total No. of concussions (%) | Total No. of concussions (%)   | Total No. of concussions (%) | Total No. of concussions (%) | Total No. of concussions (%) | Total No. of concussions (%) | Total No. of concussions (%) | Total No. of concussions (%)   | Total No. of concussions (%) | Total No. of concussions (%) | Total No. of concussions (%) | Total No. of concussions (%) | Total No. of concussions (%) | Total No. of concussions (%)   | Total No. of concussions (%) | Total No. of concussions (%) |       |  |  |
| Rate per 100,000             | Rate per 100,000               | Rate per 100,000             | Rate per 100,000             | Rate per 100,000             | Rate per 100,000             | Rate per 100,000             | Rate per 100,000               | Rate per 100,000             | Rate per 100,000             | Rate per 100,000             | Rate per 100,000             | Rate per 100,000             | Rate per 100,000               | Rate per 100,000             | Rate per 100,000             |       |  |  |
| Overall                      | 90,175                         | 52,418                       | 37,757                       | 8,134                        | 4,327                        | 3,807                        | 11,978                         | 3,219                        | 21,298                       | 2,794                        | 9,176                        | 4,207                        | 3,555                          | 2,995                        | 4,333                        | 4,333 |  |  |
| Age group, years             |                                |                              |                              |                              |                              |                              |                                |                              |                              |                              |                              |                              |                                |                              |                              |       |  |  |
| 0–4                          | 3,701 (4.1)                    | 2,002 (3.8)                  | 1,699 (4.5)                  | 54 (0.7)                     | 29 (0.7)                     | 25 (0.7)                     | 0                              | 0                            | 310 (1.0)                    | 166 (0.8)                    | 144 (1.6)                    | 420                          | 270                            | 270                          | 270                          | 270   |  |  |
| 5–9                          | 6,234 (6.9)                    | 4,047 (7.7)                  | 2,187 (5.8)                  | 158 (1.9)                    | 99 (2.3)                     | 59 (1.5)                     | n < 6                          | n < 6                        | 2,261 (7.4)                  | 1,605 (7.5)                  | 1,184                        | 1,184                        | 866                            | 866                          | 866                          | 866   |  |  |
| 10–14                        | 16,560 (18.4)                  | 11,583 (22.1)                | 4,977 (13.2)                 | 395 (4.9)                    | 225 (5.2)                    | 170 (4.5)                    | 5,063                          | 5,333                        | 9,761 (32.0)                 | 7,342 (34.5)                 | 3,187                        | 3,187                        | 2,826                          | 2,826                        | 2,826                        | 2,826 |  |  |
| 15–19                        | 18,639 (20.7)                  | 11,720 (22.4)                | 6,919 (18.3)                 | 1,569 (19.3)                 | 823 (19.0)                   | 746 (19.6)                   | 7,712                          | 5,832                        | 9,816 (32.2)                 | 6,889 (32.3)                 | 2,744                        | 2,744                        | 3,482                          | 3,482                        | 3,482                        | 3,482 |  |  |
| 20–24                        | 8,147 (9.0)                    | 4,722 (9.0)                  | 3,425 (9.1)                  | 1,193 (14.7)                 | 642 (14.8)                   | 551 (14.5)                   | 10,226                         | 8,411                        | 2,189 (7.2)                  | 1,462 (6.9)                  | 3,010                        | 3,010                        | 4,087                          | 4,087                        | 4,087                        | 4,087 |  |  |
| 25–29                        | 5,509 (6.1)                    | 4,338 (8.2)                  | 2,369 (6.3)                  | 826 (10.2)                   | 472 (10.9)                   | 354 (9.3)                    | 9,564                          | 8,686                        | 1,393 (4.6)                  | 936 (4.4)                    | 2,885                        | 2,885                        | 4,338                          | 4,338                        | 4,338                        | 4,338 |  |  |
| 30–34                        | 4,619 (5.1)                    | 5,434 (10.4)                 | 2,107 (5.6)                  | 651 (8.0)                    | 353 (8.2)                    | 298 (7.8)                    | 13,978                         | 11,615                       | 1,007 (3.3)                  | 626 (2.9)                    | 2,716                        | 2,716                        | 4,619                          | 4,619                        | 4,619                        | 4,619 |  |  |
| 35–39                        | 4,499 (5.0)                    | 4,957 (9.4)                  | 3,993 (10.7)                 | 616 (7.6)                    | 329 (7.6)                    | 287 (7.5)                    | 13,961                         | 11,246                       | 896 (2.9)                    | 553 (2.6)                    | 3,437                        | 3,437                        | 4,957                          | 4,957                        | 4,957                        | 4,957 |  |  |
| 40–44                        | 4,585 (5.1)                    | 5,387 (10.2)                 | 4,470 (11.9)                 | 626 (7.7)                    | 324 (7.5)                    | 302 (7.9)                    | 13,961                         | 11,246                       | 875 (2.9)                    | 511 (2.4)                    | 3,644                        | 3,644                        | 5,387                          | 5,387                        | 5,387                        | 5,387 |  |  |
| 45–49                        | 4,133 (4.6)                    | 5,250 (10.0)                 | 4,841 (12.7)                 | 570 (7.0)                    | 285 (6.6)                    | 285 (7.5)                    | 12,456                         | 11,579                       | 729 (2.4)                    | 433 (2.0)                    | 3,464                        | 3,464                        | 5,250                          | 5,250                        | 5,250                        | 5,250 |  |  |
| 50–54                        | 3,503 (3.9)                    | 1,587 (3.0)                  | 1,916 (5.1)                  | 445 (5.5)                    | 225 (5.2)                    | 220 (5.8)                    | 13,258                         | 13,333                       | 481 (1.6)                    | 293 (1.4)                    | 3,754                        | 3,754                        | 1,587                          | 1,587                        | 1,587                        | 1,587 |  |  |
| 55–59                        | 2,821 (3.1)                    | 4,325 (8.2)                  | 1,523 (4.0)                  | 353 (4.3)                    | 189 (4.4)                    | 164 (4.3)                    | 12,465                         | 10,582                       | 290 (1.0)                    | 179 (0.8)                    | 1,112                        | 1,112                        | 4,325                          | 4,325                        | 4,325                        | 4,325 |  |  |
| 60–64                        | 2,036 (2.3)                    | 3,929 (7.5)                  | 1,076 (2.8)                  | 225 (2.8)                    | 117 (2.7)                    | 108 (2.8)                    | 9,333                          | 10,256                       | 203 (0.7)                    | 125 (0.6)                    | 1,112                        | 1,112                        | 3,929                          | 3,929                        | 3,929                        | 3,929 |  |  |
| 65–69                        | 1,486 (1.6)                    | 693 (1.3)                    | 793 (2.1)                    | 148 (1.8)                    | 74 (1.7)                     | 74 (1.9)                     | 13,514                         | 13,514                       | 135 (0.4)                    | 88 (0.4)                     | 1,112                        | 1,112                        | 1,486                          | 1,486                        | 1,486                        | 1,486 |  |  |
| 70–74                        | 1,180 (1.3)                    | 567 (1.1)                    | 3,175 (8.4)                  | 115 (1.4)                    | 55 (1.3)                     | 60 (1.6)                     | 7,826                          | 5,610                        | 64 (0.2)                     | 40 (0.2)                     | 24 (0.3)                     | 24                           | 1,180                          | 1,180                        | 1,180                        | 1,180 |  |  |
| 75–79                        | 1,013 (1.1)                    | 2,172 (4.1)                  | 576 (1.5)                    | 100 (1.2)                    | 45 (1.0)                     | 55 (1.4)                     | 7,000                          | 6,083                        | 40 (0.1)                     | 28 (0.1)                     | 0                            | 0                            | 2,172                          | 2,172                        | 2,172                        | 2,172 |  |  |
| 80–84                        | 827 (0.9)                      | 324 (0.6)                    | 503 (1.3)                    | 62 (0.8)                     | 29 (0.7)                     | 33 (0.9)                     | n < 6                          | n < 6                        | 17 (0.1)                     | NR <sup>a</sup>              | 0                            | 0                            | 1,013                          | 1,013                        | 1,013                        | 1,013 |  |  |
| 85+                          | 683 (0.8)                      | 232 (0.4)                    | 451 (1.2)                    | 28 (0.3)                     | 12 (0.3)                     | 16 (0.4)                     | n < 6                          | n < 6                        | 7 (0.0)                      | NR <sup>a</sup>              | 0                            | 0                            | 683                            | 683                          | 683                          | 683   |  |  |

n < 6—cell size less than 6.

<sup>a</sup>Data are NR due to residual disclosure of small cell size (n < 6).

ED, emergency department; MVC, motor vehicle collision; NR, not reported.
