# Supplementary material for: Neck Injury Comorbidity in Concussion-Related Emergency Department Visits: A Population-Based Study of Sex Differences Across the Life Span
Source: PubMed Central journal article supplement (PMC6482894; doi:10.1089/jwh.2018.7282), 2019-04-22
Supplement: Supp_Table2.pdf [file Supp_Table2.pdf]

SUPPLEMENTARY TABLE S2. LOGISTIC REGRESSION MODEL EXAMINING THE ODDS OF COMORBID NECK INJURY FOR SEX (REFERENCE=MALE) AMONG PATIENTS WITH A FIRST CONCUSSION-RELATED EMERGENCY DEPARTMENT VISIT IN ONTARIO, CANADA, 2002/2003–2011/012, BY 5-YEAR AGE GROUPS

| Age group, years | All concussions |                         |      | MVC-related concussions |                         |      | Sports-related concussions |                         |      |
|------------------|-----------------|-------------------------|------|-------------------------|-------------------------|------|----------------------------|-------------------------|------|
|                  | Odds ratio      | 95% Confidence interval | p    | Odds ratio              | 95% Confidence interval | p    | Odds ratio                 | 95% Confidence interval | p    |
| 0–4              | 1.05            | 0.73–1.51               | 0.79 | 1.26                    | 0.38–4.19               | 0.70 | 0.90                       | 0.45–1.82               | 0.77 |
| 5–9              | 1.27            | 1.02–1.57               | 0.03 | 1.39                    | 0.65–2.94               | 0.39 | 1.21                       | 0.84–1.73               | 0.31 |
| 10–14            | 1.45            | 1.27–1.64               | 0.00 | 1.48                    | 0.95–2.29               | 0.08 | 1.47                       | 1.23–1.76               | 0.00 |
| 15–19            | 1.57            | 1.42–1.73               | 0.00 | 1.54                    | 1.19–1.99               | 0.00 | 1.65                       | 1.41–1.93               | 0.00 |
| 20–24            | 1.63            | 1.47–1.8                | 0.00 | 1.56                    | 1.27–1.92               | 0.00 | 1.73                       | 1.42–2.1                | 0.00 |
| 25–29            | 1.62            | 1.46–1.81               | 0.00 | 1.56                    | 1.26–1.92               | 0.00 | 1.72                       | 1.38–2.14               | 0.00 |
| 30–34            | 1.57            | 1.41–1.75               | 0.00 | 1.53                    | 1.23–1.88               | 0.00 | 1.63                       | 1.28–2.09               | 0.00 |
| 35–39            | 1.48            | 1.33–1.64               | 0.00 | 1.47                    | 1.2–1.8                 | 0.00 | 1.51                       | 1.13–2.02               | 0.01 |
| 40–44            | 1.37            | 1.22–1.53               | 0.00 | 1.40                    | 1.14–1.72               | 0.00 | 1.38                       | 0.97–1.95               | 0.07 |
| 45–49            | 1.25            | 1.1–1.41                | 0.00 | 1.32                    | 1.05–1.65               | 0.02 | 1.25                       | 0.83–1.88               | 0.29 |
| 50–54            | 1.13            | 0.98–1.3                | 0.10 | 1.23                    | 0.95–1.6                | 0.12 | 1.15                       | 0.72–1.84               | 0.57 |
| 55–59            | 1.02            | 0.87–1.2                | 0.80 | 1.14                    | 0.85–1.55               | 0.38 | 1.08                       | 0.62–1.87               | 0.78 |
| 60–64            | 0.93            | 0.77–1.11               | 0.42 | 1.06                    | 0.75–1.49               | 0.73 | 1.06                       | 0.53–2.09               | 0.88 |
| 65–69            | 0.85            | 0.69–1.05               | 0.13 | 0.98                    | 0.66–1.45               | 0.93 | 1.09                       | 0.43–2.75               | 0.86 |
| 70–74            | 0.80            | 0.62–1.03               | 0.08 | 0.91                    | 0.56–1.49               | 0.71 | 1.19                       | 0.32–4.48               | 0.80 |
| 75–79            | 0.76            | 0.54–1.08               | 0.13 | 0.85                    | 0.43–1.69               | 0.64 | 1.41                       | 0.21–9.44               | 0.72 |
| 80–84            | 0.75            | 0.46–1.23               | 0.26 | 0.80                    | 0.29–2.18               | 0.66 | 1.83                       | 0.13–26.46              | 0.66 |
| 85+              | 0.77            | 0.38–1.55               | 0.47 | 0.76                    | 0.17–3.28               | 0.71 | 2.63                       | 0.07–101.64             | 0.60 |
