# Supplementary material for: Neck Injury Comorbidity in Concussion-Related Emergency Department Visits: A Population-Based Study of Sex Differences Across the Life Span
Source: PubMed Central journal article supplement (PMC6482894; doi:10.1089/jwh.2018.7282), 2019-04-22
Supplement: Supp_Table3.pdf [file Supp_Table3.pdf]

SUPPLEMENTARY TABLE S3. LOGISTIC REGRESSION MODEL EXAMINING THE ODDS OF COMORBID NECK INJURY FOR AGE AMONG FEMALE PATIENTS WITH A FIRST CONCUSSION-RELATED EMERGENCY DEPARTMENT VISIT IN ONTARIO, CANADA, 2002/2003–2011/2012, BY 5-YEAR AGE GROUPS

| Age group, years | <i>All concussions</i> |                                |          | <i>MVC-related concussions</i> |                                |          | <i>Sports-related concussions</i> |                                |          |
|------------------|------------------------|--------------------------------|----------|--------------------------------|--------------------------------|----------|-----------------------------------|--------------------------------|----------|
|                  | <i>Odds ratio</i>      | <i>95% Confidence interval</i> | <i>p</i> | <i>Odds ratio</i>              | <i>95% Confidence interval</i> | <i>p</i> | <i>Odds ratio</i>                 | <i>95% Confidence interval</i> | <i>p</i> |
| 0–4              | 1.80                   | 1.6–2.03                       | 0.00     | 1.82                           | 1.31–2.54                      | 0.00     | 1.69                              | 1.26–2.27                      | 0.00     |
| 5–9              | 1.59                   | 1.46–1.73                      | 0.00     | 1.62                           | 1.27–2.07                      | 0.00     | 1.44                              | 1.19–1.76                      | 0.00     |
| 10–14            | 1.41                   | 1.33–1.5                       | 0.00     | 1.45                           | 1.22–1.72                      | 0.00     | 1.26                              | 1.11–1.42                      | 0.00     |
| 15–19            | 1.27                   | 1.23–1.32                      | 0.00     | 1.31                           | 1.17–1.47                      | 0.00     | 1.12                              | 1.04–1.21                      | 0.00     |
| 20–24            | 1.16                   | 1.13–1.19                      | 0.00     | 1.20                           | 1.12–1.29                      | 0.00     | 1.02                              | 0.96–1.08                      | 0.57     |
| 25–29            | 1.07                   | 1.05–1.1                       | 0.00     | 1.11                           | 1.06–1.17                      | 0.00     | 0.95                              | 0.88–1.02                      | 0.14     |
| 30–34            | 1.00                   | 0.98–1.03                      | 1.00     | 1.04                           | 0.99–1.09                      | 0.09     | 0.90                              | 0.83–0.98                      | 0.01     |
| 35–39            | 0.94                   | 0.92–0.97                      | 0.00     | 0.99                           | 0.93–1.04                      | 0.62     | 0.87                              | 0.8–0.95                       | 0.00     |
| 40–44            | 0.90                   | 0.87–0.93                      | 0.00     | 0.94                           | 0.89–1                         | 0.07     | 0.86                              | 0.79–0.95                      | 0.00     |
| 45–49            | 0.87                   | 0.85–0.9                       | 0.00     | 0.91                           | 0.86–0.97                      | 0.00     | 0.87                              | 0.79–0.97                      | 0.01     |
| 50–54            | 0.85                   | 0.83–0.88                      | 0.00     | 0.89                           | 0.84–0.95                      | 0.00     | 0.90                              | 0.78–1.05                      | 0.18     |
| 55–59            | 0.84                   | 0.81–0.87                      | 0.00     | 0.88                           | 0.82–0.94                      | 0.00     | 0.96                              | 0.77–1.19                      | 0.68     |
| 60–64            | 0.84                   | 0.8–0.88                       | 0.00     | 0.88                           | 0.8–0.96                       | 0.01     | 1.03                              | 0.76–1.4                       | 0.84     |
| 65–69            | 0.85                   | 0.8–0.91                       | 0.00     | 0.88                           | 0.77–1.02                      | 0.08     | 1.14                              | 0.75–1.73                      | 0.54     |
| 70–74            | 0.87                   | 0.8–0.96                       | 0.00     | 0.90                           | 0.74–1.1                       | 0.31     | 1.28                              | 0.74–2.22                      | 0.37     |
| 75–79            | 0.90                   | 0.8–1.02                       | 0.10     | 0.93                           | 0.71–1.22                      | 0.59     | 1.48                              | 0.74–2.96                      | 0.27     |
| 80–84            | 0.95                   | 0.81–1.11                      | 0.48     | 0.97                           | 0.68–1.39                      | 0.85     | 1.74                              | 0.74–4.12                      | 0.21     |
| 85+              | 1.00                   | 0.82–1.22                      | 0.99     | 1.02                           | 0.64–1.61                      | 0.94     | 2.09                              | 0.74–5.96                      | 0.17     |
