# Supplementary material for: Neck Injury Comorbidity in Concussion-Related Emergency Department Visits: A Population-Based Study of Sex Differences Across the Life Span
Source: PubMed Central journal article supplement (PMC6482894; doi:10.1089/jwh.2018.7282), 2019-04-22
Supplement: Supp_Table4.pdf [file Supp_Table4.pdf]

SUPPLEMENTARY TABLE S4. LOGISTIC REGRESSION MODEL EXAMINING THE ODDS OF COMORBID NECK INJURY FOR AGE AMONG MALE PATIENTS WITH A FIRST CONCUSSION-RELATED EMERGENCY DEPARTMENT VISIT IN ONTARIO, CANADA, 2002/2003–2011/2012, BY 5-YEAR AGE GROUPS

| Age group, years | <i>All concussions</i> |                                |          | <i>MVC-related concussions</i> |                                |          | <i>Sports-related concussions</i> |                                |          |
|------------------|------------------------|--------------------------------|----------|--------------------------------|--------------------------------|----------|-----------------------------------|--------------------------------|----------|
|                  | <i>Odds ratio</i>      | <i>95% Confidence interval</i> | <i>p</i> | <i>Odds ratio</i>              | <i>95% Confidence interval</i> | <i>p</i> | <i>Odds ratio</i>                 | <i>95% Confidence interval</i> | <i>p</i> |
| 0–4              | 1.49                   | 1.33–1.67                      | 0.00     | 1.66                           | 1.19–2.33                      | 0.00     | 1.26                              | 1.01–1.58                      | 0.04     |
| 5–9              | 1.39                   | 1.28–1.51                      | 0.00     | 1.52                           | 1.18–1.95                      | 0.00     | 1.19                              | 1.02–1.38                      | 0.03     |
| 10–14            | 1.30                   | 1.23–1.38                      | 0.00     | 1.39                           | 1.17–1.66                      | 0.00     | 1.12                              | 1.02–1.23                      | 0.02     |
| 15–19            | 1.23                   | 1.19–1.27                      | 0.00     | 1.29                           | 1.15–1.45                      | 0.00     | 1.07                              | 1.01–1.13                      | 0.03     |
| 20–24            | 1.16                   | 1.14–1.19                      | 0.00     | 1.21                           | 1.12–1.3                       | 0.00     | 1.03                              | 0.98–1.08                      | 0.33     |
| 25–29            | 1.11                   | 1.08–1.13                      | 0.00     | 1.14                           | 1.08–1.2                       | 0.00     | 0.99                              | 0.94–1.06                      | 0.84     |
| 30–34            | 1.06                   | 1.03–1.09                      | 0.00     | 1.08                           | 1.03–1.14                      | 0.00     | 0.97                              | 0.91–1.04                      | 0.41     |
| 35–39            | 1.02                   | 0.99–1.05                      | 0.17     | 1.04                           | 0.98–1.1                       | 0.25     | 0.96                              | 0.89–1.03                      | 0.23     |
| 40–44            | 0.99                   | 0.96–1.02                      | 0.47     | 1.00                           | 0.94–1.07                      | 0.99     | 0.95                              | 0.88–1.02                      | 0.18     |
| 45–49            | 0.96                   | 0.93–0.99                      | 0.01     | 0.97                           | 0.91–1.04                      | 0.43     | 0.95                              | 0.88–1.03                      | 0.23     |
| 50–54            | 0.94                   | 0.91–0.97                      | 0.00     | 0.96                           | 0.9–1.02                       | 0.17     | 0.96                              | 0.87–1.06                      | 0.44     |
| 55–59            | 0.93                   | 0.89–0.96                      | 0.00     | 0.95                           | 0.88–1.02                      | 0.14     | 0.98                              | 0.85–1.13                      | 0.76     |
| 60–64            | 0.92                   | 0.87–0.96                      | 0.00     | 0.95                           | 0.86–1.04                      | 0.26     | 1.00                              | 0.82–1.22                      | 0.97     |
| 65–69            | 0.91                   | 0.85–0.98                      | 0.01     | 0.95                           | 0.83–1.1                       | 0.50     | 1.04                              | 0.79–1.36                      | 0.78     |
| 70–74            | 0.91                   | 0.82–1.01                      | 0.06     | 0.97                           | 0.79–1.19                      | 0.74     | 1.08                              | 0.76–1.55                      | 0.66     |
| 75–79            | 0.91                   | 0.8–1.04                       | 0.19     | 0.99                           | 0.75–1.31                      | 0.94     | 1.14                              | 0.72–1.8                       | 0.57     |
| 80–84            | 0.92                   | 0.78–1.1                       | 0.36     | 1.02                           | 0.71–1.47                      | 0.91     | 1.21                              | 0.68–2.14                      | 0.51     |
| 85+              | 0.94                   | 0.76–1.16                      | 0.56     | 1.06                           | 0.67–1.7                       | 0.80     | 1.30                              | 0.65–2.6                       | 0.47     |
