# Supplementary material for: Neck Injury Comorbidity in Concussion-Related Emergency Department Visits: A Population-Based Study of Sex Differences Across the Life Span
Source: PubMed Central journal article supplement (PMC6482894; doi:10.1089/jwh.2018.7282), 2019-04-22
Supplement: Supp_Table5.pdf [file Supp_Table5.pdf]

SUPPLEMENTARY TABLE S5. INTERNATIONAL STATISTICAL CLASSIFICATION OF DISEASES AND RELATED HEALTH PROBLEMS, TENTH REVISION, CANADA (ICD-10-CA) USED TO DEFINE CONCUSSION, NECK INJURY, MECHANISM OF INJURY, INTENTION OF INJURY, AND SPORTS INJURY

|                                                 |                                                                                                                                                                                                                                                      |
|-------------------------------------------------|------------------------------------------------------------------------------------------------------------------------------------------------------------------------------------------------------------------------------------------------------|
| Concussion                                      | S06.0                                                                                                                                                                                                                                                |
| Injuries to the neck                            | (S12–S17), S19                                                                                                                                                                                                                                       |
| Case definitions used for mechanism of injury   |                                                                                                                                                                                                                                                      |
| Fall                                            | (W00–W19), X80, Y01, Y30                                                                                                                                                                                                                             |
| Struck by/against                               | (W20–W22), (W50–W52), X79, Y00, Y04, Y35.3, Y29                                                                                                                                                                                                      |
| MVC                                             | (V30–V79 [only 0.4–0.9]), (V81–V82 [only 0.1]), (V83–V86 [only 0.0–0.3]), (V20–V28 [only 0.3–0.9]), V29 (only 0.4–0.9), (V12–V14 [only 0.3–0.9]), V19 (only 0.4–0.6), (V02–V04 [only 0.1–0.9]), V09.2, V80 (only 0.3–0.5), V87 (only 0.0–0.8), V89.2 |
| Other transportation                            |                                                                                                                                                                                                                                                      |
| Other pedal cycling                             | (V10, V11, V15, V16, V17, V18), (V12–V14 [only 0.0–0.2]), V19 (only 0.0–0.3, 0.8–0.9)                                                                                                                                                                |
| Other pedestrian                                | (V01, V05, V06), (V02–V04 [only 0.0–0.3]), V09 (only 0.0, 0.1, 0.3, 0.9)                                                                                                                                                                             |
| Other land transport                            | (V20–V28 [only 0.0–0.2]), V29 (only 0.0–0.3), (V30–V79 [only 0.0–0.3]), V80 (only 0.0–0.2 and 0.6–0.9), (V81–V82 [not 0.1]), (V83–V86 [only 0.4–0.9]), V87.9, V88 (0.0–0.9), V89 (only in 0.0,0.1,0.3,0.9), X82, Y03, Y32                            |
| Other transport                                 | (V90–V99), Y361, U011                                                                                                                                                                                                                                |
| Other                                           |                                                                                                                                                                                                                                                      |
| E.g., drowning, fire/flare, and cut/pierce      | All other injury-related ICD-10-CA codes                                                                                                                                                                                                             |
| Case definitions used for intention of injury   |                                                                                                                                                                                                                                                      |
| Unintentional                                   |                                                                                                                                                                                                                                                      |
| Unintentional                                   | (V01–X59), Y85, Y86                                                                                                                                                                                                                                  |
| Undetermined                                    | (Y10–Y34), Y87.2, Y89.9                                                                                                                                                                                                                              |
| Intentional                                     |                                                                                                                                                                                                                                                      |
| Assault                                         | (X85–Y09), Y87.1, (U01–U02)                                                                                                                                                                                                                          |
| Suicide                                         | (X60–X84), Y87.0, U03                                                                                                                                                                                                                                |
| Legal/war                                       | Y35, Y36, Y89.0–Y89.1                                                                                                                                                                                                                                |
| Case definitions used for sports injuries       |                                                                                                                                                                                                                                                      |
| Baseball                                        | W22.05, W51.05                                                                                                                                                                                                                                       |
| Hit by ball                                     | W21.00                                                                                                                                                                                                                                               |
| Hit by bat                                      | W21.01                                                                                                                                                                                                                                               |
| Cycling                                         | V10–V19                                                                                                                                                                                                                                              |
| Fall involving rollerblade/scooter/skateboard   | W02.02, W02.03, W02.08                                                                                                                                                                                                                               |
| Football/rugby                                  | W22.03, W51.03                                                                                                                                                                                                                                       |
| Hockey                                          | W21.02, W21.03, W22.02, W51.02                                                                                                                                                                                                                       |
| Ice skates                                      | W02.00                                                                                                                                                                                                                                               |
| Playground equipment                            | W09                                                                                                                                                                                                                                                  |
| Pool and natural water swimming/diving/drowning | W16, (W67–W74)                                                                                                                                                                                                                                       |
| Ski/snowboard                                   | W02.01, W02.04, W22.00, W51.00                                                                                                                                                                                                                       |
| Soccer                                          | W22.04, W51.04                                                                                                                                                                                                                                       |
| Tobogganing                                     | W22.01, W51.01                                                                                                                                                                                                                                       |
| Recreational boating                            | (V90–V94 [only 0.2–0.8])                                                                                                                                                                                                                             |
| ATV/snowmobile                                  | V86                                                                                                                                                                                                                                                  |
| Other sports-related injuries                   | W02.08, W21.08, W21.09, W22.07, W51.07                                                                                                                                                                                                               |

Notes on injury severity: Severity grouped into mild, moderate, and severe by ICD-10-CA code, as per Abbreviated Injury Scale (AIS). Injuries classified as Unknown occurred when ICD-10-CA code was not specific enough.
